# Supplementary material
Source: PubMed Central journal article supplement (PMC5414559)
Supplement: jciinsight-2-92872-s001.pdf [file jciinsight-2-92872-s001.pdf]

Supplemental Figure 1

|      |        | HCVpp      |      |      |      |      |      |       |       |       |       |       |            |      |      |      |      |      |      |      |
|------|--------|------------|------|------|------|------|------|-------|-------|-------|-------|-------|------------|------|------|------|------|------|------|------|
|      |        | subtype 1a |      |      |      |      |      |       |       |       |       |       | subtype 1b |      |      |      |      |      |      |      |
|      |        | 1a09       | 1a31 | 1a38 | 1a53 | 1a72 | 1a80 | 1a116 | 1a123 | 1a129 | 1a142 | 1a154 | 1a157      | 1b09 | 1b14 | 1b21 | 1b34 | 1b38 | 1b52 | 1b58 |
| mAbs | HEPC82 | 43         | 52   | 36   | 91   | 36   | 35   | 30    | 38    | 27    | -5    | 29    | -25        | 28   | 41   | 13   | 28   | 52   | 43   | -9   |
|      | HEPC90 | 46         | 50   | 9    | 59   | 66   | 15   | 90    | 25    | -5    | 54    | 33    | -54        | 27   | 12   | 22   | 25   | 29   | 25   | -50  |
|      | HEPC96 | 19         | -60  | -0   | 68   | 62   | -32  | -5    | 4.9   | -18   | 60    | 25    | 4.2        | -18  | 0.4  | 65   | 7.7  | -28  | -20  | 4.8  |
|      | HEPC80 | 4.9        | 13   | -14  | 59   | 57   | -27  | 29    | -1    | -37   | 21    | 32    | -10        | -1   | -8   | 49   | -5   | -18  | -38  | -50  |
|      | HEPC46 | -5         | 12   | 25   | 7    | 40   | 20   | 29    | -3    | 27    | -3    | 2.2   | 10         | 20   | 20   | 15   | 33   | 22   | 8.8  | 11   |
|      | HEPC85 | 25         | -3   | 16   | 93   | 20   | -8   | 17    | 10    | 2.8   | -32   | -1    | -34        | -20  | 27   | -35  | -42  | -4   | 29   | -31  |
|      | HEPC50 | 27         | 15   | 16   | 22   | 23   | -2   | 2.3   | -0    | 12    | -30   | -10   | -49        | -30  | 2.2  | 38   | 14   | 5.5  | 28   | -5   |
|      | HEPC87 | -19        | -92  | -34  | 97   | 10   | -80  | -35   | -62   | -46   | 25    | -69   | -30        | -28  | -9   | -8   | 7.4  | -46  | -41  | -2   |
|      | HEPC91 | -47        | 4.2  | -20  | 84   | -23  | 22   | -43   | -13   | -21   | -1    | 2.4   | 1          | -9   | -28  | -26  | -14  | 16   | -26  | -27  |
|      | HEPC97 | -71        | -7   | -46  | -6   | -40  | 3.2  | -8    | 1     | 18    | -49   | -11   | 5.9        | -1   | -39  | -26  | 1.8  | -9   | -28  | -22  |

| % neutralization | >75 | 50-75 | 25-50 | <25 |
|------------------|-----|-------|-------|-----|
|                  |     |       |       |     |

**Figure S1.** Neutralizing breadth of the 10 mAbs not shown in Figure 2 against a diverse panel of genotype 1a or 1b HCV pseudoparticles (HCVpp). Neutralization patterns for the 5 most broadly-neutralizing mAbs are shown in Figure 2; data for the remaining 10 mAbs are shown here. MAbs marked with blue were isolated from Subject 117 and mAbs marked with green were isolated from Subject 110. Values shown are percent neutralization achieved by 50 µg/mL of mAb. Values are means of two replicate tests.

Supplemental Figure 2

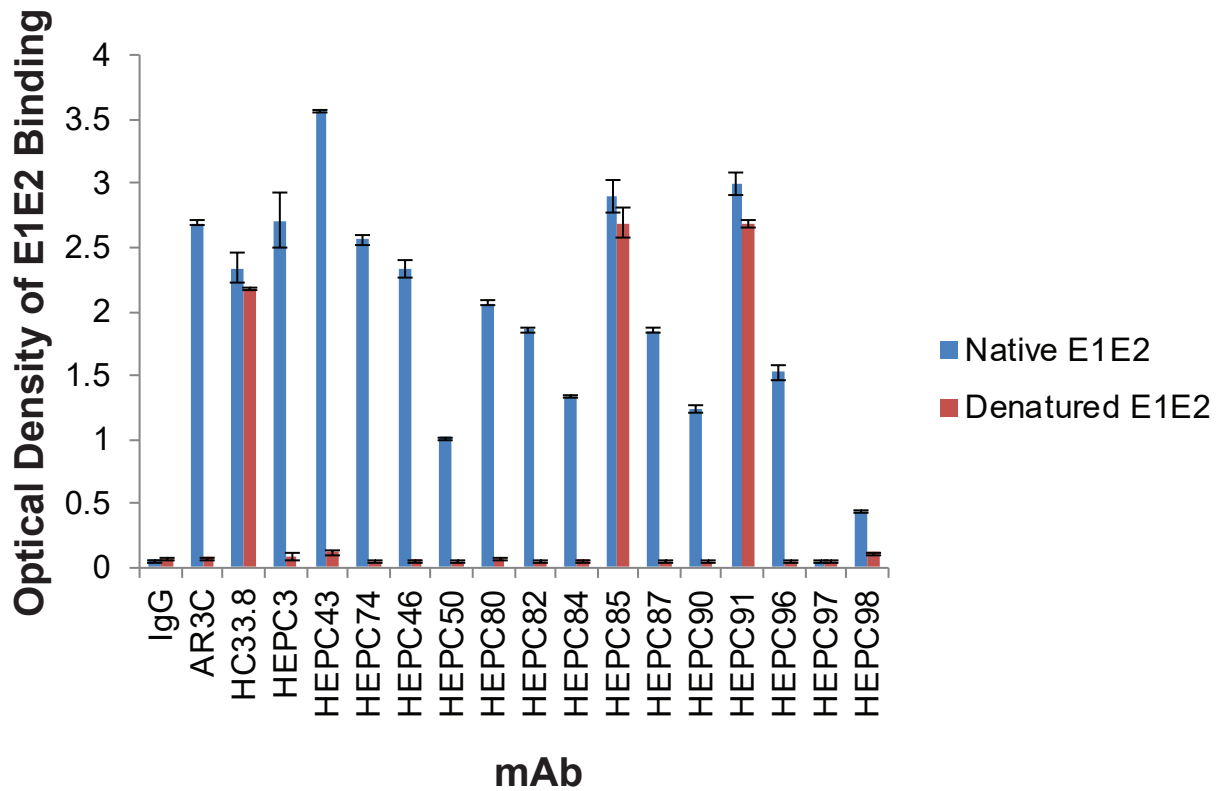

**Figure S2.** Binding of mAbs to native and denatured E1E2. Binding of 2  $\mu\text{g}/\text{mL}$  of each mAb to native E1E2 (clone 1a53) or to the same E1E2 protein after boiling of E1E2 in detergent. Reference mAbs AR3C (conformational epitope) and HC33.8 (linear epitope) are included as controls. Values are the means of two replicate tests, and error bars indicate standard deviations.

Supplemental Figure 3

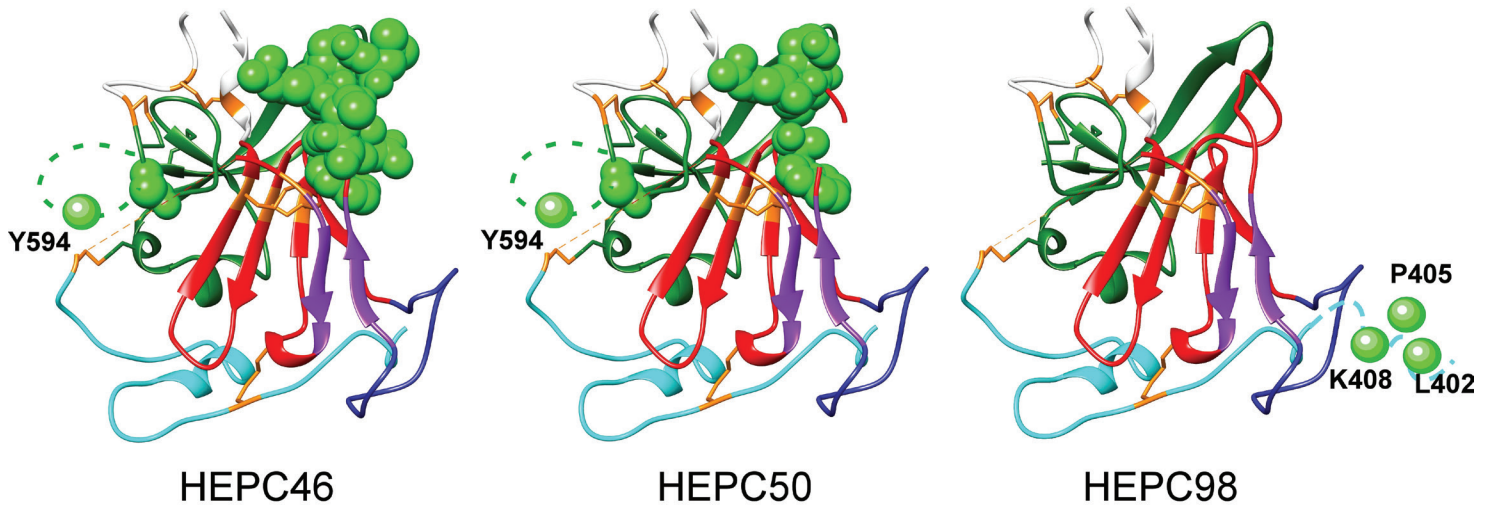

| mAb    | Binding residues                                                            |
|--------|-----------------------------------------------------------------------------|
| HEPC46 | N541A, T542A, R543A, P544A, P545A, L546A, N548A, W549A, Y594A, G598A, V633A |
| HEPC50 | R543A, P544A, P545A, W549A, Y594A, C597A, G598A                             |
| HEPC98 | L402A, P405A, K408A                                                         |

**Figure S3.** Binding epitopes of 3 mAbs not shown in Figure 4. Binding residues were identified by measuring relative binding of mAbs to strain H77 E1E2 or alanine scanning mutants spanning the full H77 E1E2 sequence. Critical binding residues are marked with green spheres superimposed on the H77 E2 core structure (31). MAbs not shown here or in Figure 4 did not have adequate affinity for strain H77 E1E2 to be mapped by this method.

A

|                   |        | Blocking mAbs |       |        |        |        |        |        |        |        |        |        |        |        |        |        |
|-------------------|--------|---------------|-------|--------|--------|--------|--------|--------|--------|--------|--------|--------|--------|--------|--------|--------|
|                   |        | IgG           | HEPC3 | HEPC43 | HEPC74 | HEPC87 | HEPC85 | HEPC91 | HEPC82 | HEPC84 | HEPC90 | HEPC50 | HEPC46 | HEPC80 | HEPC98 | HEPC96 |
| Biotinylated mAbs | HEPC3  | 1.01          | 0.16  | 0.30   | 0.16   | 0.83   | 0.98   | 0.90   | 0.88   | 1.01   | 1.00   | 0.99   | 0.94   | 0.91   | 1.01   | 0.96   |
|                   | HEPC43 | 0.99          | 0.23  | 0.21   | 0.15   | 1.02   | 1.00   | 1.23   | 0.83   | 1.01   | 1.11   | 0.96   | 0.92   | 1.12   | 0.99   | 1.19   |
|                   | HEPC74 | 0.99          | 0.29  | 0.43   | 0.21   | 0.99   | 0.99   | 1.07   | 0.93   | 1.01   | 1.04   | 0.98   | 0.97   | 1.02   | 0.98   | 1.04   |
|                   | HEPC87 | 1.01          | 0.54  | 0.34   | 0.25   | 0.50   | 0.33   | 0.31   | 0.30   | 0.59   | 0.52   | 0.96   | 0.98   | 1.01   | 0.97   | 0.97   |
|                   | HEPC85 | 1.06          | 1.04  | 1.09   | 1.09   | 0.99   | 0.33   | 0.27   | 1.02   | 1.03   | 0.94   | 1.11   | 1.03   | 0.91   | 1.14   | 1.00   |
|                   | HEPC91 | 1.02          | 1.03  | 1.01   | 1.02   | 1.00   | 0.56   | 0.51   | 1.01   | 1.01   | 1.01   | 1.02   | 1.00   | 1.00   | 1.02   | 1.01   |
|                   | HEPC82 | 1.09          | 0.46  | 0.30   | 0.24   | 0.36   | 0.27   | 0.20   | 0.17   | 0.62   | 0.60   | 1.01   | 0.96   | 1.34   | 1.08   | 0.86   |
|                   | HEPC84 | 1.09          | 1.56  | 1.36   | 1.30   | 0.61   | 1.55   | 1.17   | 0.50   | 0.24   | 0.32   | 1.06   | 0.62   | 0.78   | 1.19   | 0.82   |
|                   | HEPC90 | 1.01          | 1.22  | 1.18   | 1.15   | 0.84   | 1.22   | 1.20   | 0.48   | 0.29   | 0.30   | 1.07   | 0.74   | 0.84   | 1.04   | 1.02   |
|                   | HEPC50 | 1.03          | 0.54  | 0.56   | 0.50   | 0.85   | 1.21   | 1.29   | 0.90   | 0.87   | 0.93   | 0.43   | 1.10   | 0.92   | 1.09   | 0.80   |
|                   | HEPC46 | 1.07          | 0.78  | 0.66   | 0.64   | 0.88   | 0.92   | 0.64   | 0.88   | 0.84   | 0.77   | 1.14   | 0.37   | 1.12   | 1.09   | 1.06   |
|                   | HEPC80 | 1.03          | 0.69  | 0.56   | 0.66   | 1.07   | 0.85   | 0.88   | 1.07   | 0.72   | 0.86   | 1.01   | 1.05   | 0.61   | 1.02   | 0.88   |
|                   | HEPC98 | 1.07          | 0.42  | 0.93   | 1.13   | 0.75   | 0.08   | 0.04   | 0.61   | 1.09   | 1.08   | 1.10   | 1.03   | 1.10   | 0.96   | 1.03   |
|                   | HEPC96 | 1.05          | 0.92  | 0.89   | 0.89   | 1.01   | 0.91   | 0.75   | 0.95   | 0.92   | 1.12   | 0.95   | 1.12   | 0.59   | 1.06   | 0.73   |

B

|                   |        | Blocking mAbs |      |      |      |      |         |      |      |        |      |
|-------------------|--------|---------------|------|------|------|------|---------|------|------|--------|------|
|                   |        | IgG           | AR1A | AR2A | AR3A | AR3C | HC84.26 | AR4A | AR5A | HC33.8 | self |
| Biotinylated mAbs | HEPC3  | 0.79          | 0.87 | 0.86 | 0.3  | 0.57 | 0.63    | 1.03 | 0.82 | 0.83   | 0.22 |
|                   | HEPC43 | 1.02          | 0.69 | 0.91 | 0.44 | 0.40 | 0.72    | 1.05 | 0.77 | 0.63   | 0.23 |
|                   | HEPC74 | 1.05          | 1.06 | 1.05 | 0.88 | 0.65 | 1.04    | 1.02 | 1.06 | 1.03   | 0.34 |
|                   | HEPC50 | 1.02          | 1.29 | 1.28 | 0.45 | nd   | 0.8     | 0.82 | 0.91 | 0.79   | 0.36 |
|                   | HEPC98 | 0.94          | 1.34 | 1.2  | 0.51 | 0.70 | 1.1     | 1.09 | 1.1  | 0.1    | 0.65 |
|                   | HEPC46 | 0.98          | 0.91 | 0.93 | 0.58 | nd   | 1.04    | 0.75 | 1.06 | 0.92   | 0.47 |
|                   | HEPC82 | 0.99          | 1.04 | 0.84 | 0.89 | 0.22 | 1.02    | 0.26 | 0.7  | 0.58   | 0.36 |
|                   | HEPC84 | 1.28          | 0.99 | 0.87 | 1.52 | 1.11 | 0.77    | 0.27 | 0.66 | 0.73   | 0.3  |
| HEPC85            | 1.02   | 0.93          | 0.91 | 0.77 | nd   | 0.87 | 0.73    | 0.84 | 0.79 | 0.32   |      |

**Figure S4.** Competition-binding between mAbs. Names of mAbs isolated from Subject 117 or Subject 110 are marked in blue or green, respectively. Binding of 2  $\mu\text{g/mL}$  of the mAbs on the Y-axis (“Biotinylated mAbs”) to strain 1a53 E1E2 was measured in the presence or absence of the mAbs on the X-axis (“Blocking mAbs”) at a concentration of 20  $\mu\text{g/mL}$ . Values shown are binding of the biotinylated mAb in the presence of blocking mAb, relative to binding in the absence of blocking mAb. Combinations resulting in relative binding  $<0.7$  or  $<0.3$  are marked in yellow or red, respectively. **(A)** Competition-binding between novel mAbs and each other. **(B)** Competition-binding between novel mAbs and a panel of previously published anti-HCV bNAb.

Supplemental Figure 5

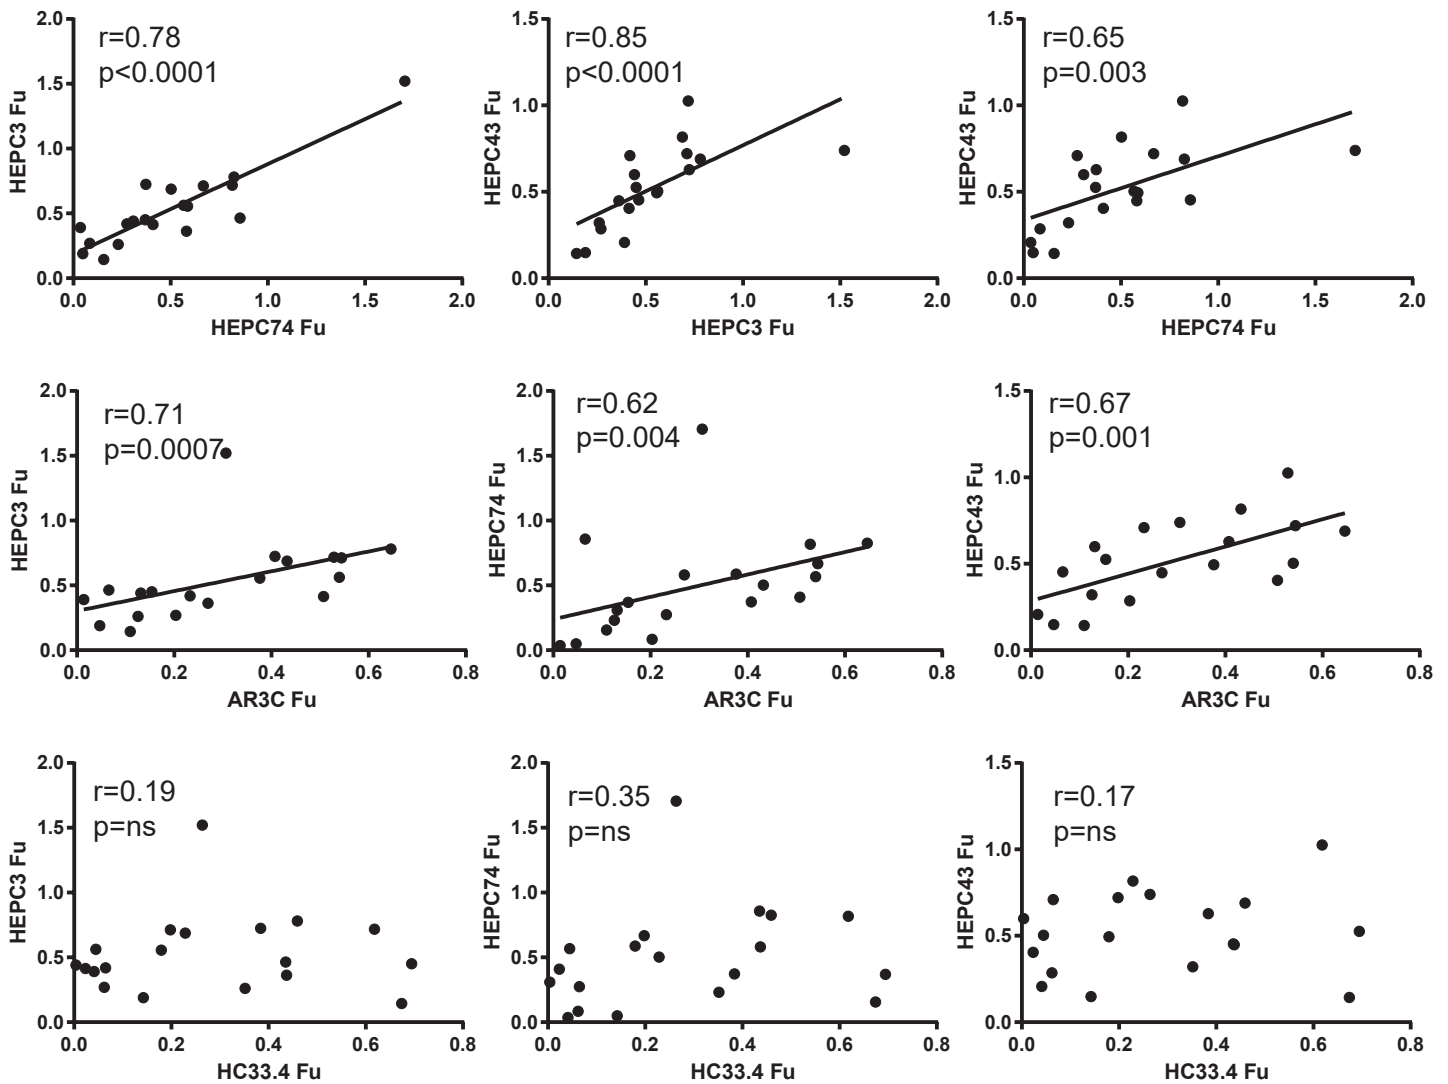

**Figure S5.** Examples of correlations between neutralization profiles used for hierarchical clustering of mAbs in **Figure 4**. Each point indicates neutralization of an individual HCVpp by one antibody on the x-axis and a second antibody on the y-axis. Neutralization values are fraction unaffected (Fu) at 10  $\mu$ g/mL of each antibody. Fu=infection in the presence of mAb/infection in the presence of nonspecific IgG. Spearman correlations ( $r$ ) and  $p$  values are indicated for each mAb pair. HEPC3, HEPC74, and HEPC43 show strong, statistically significant correlations with each other and with AR3C, but no correlation with HC33.4.

# Supplemental Figure 6A

HEPC3

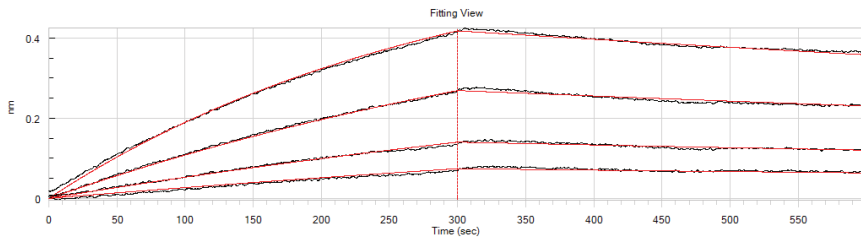

| KD (M)   | KD Error | Full X <sup>2</sup> | Full R <sup>2</sup> |
|----------|----------|---------------------|---------------------|
| 5.18E-07 | 1.39E-08 | 0.11743             | 0.996778            |

HEPC3 VH-L30F

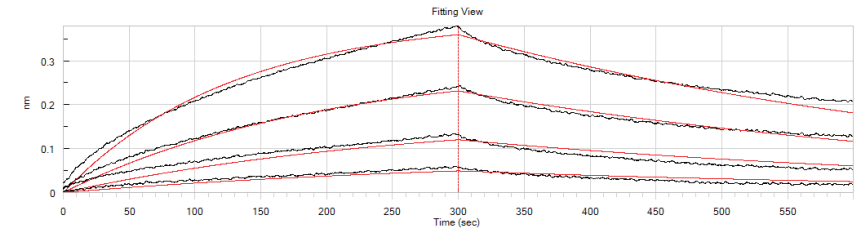

| KD (M)   | KD Error | Full X <sup>2</sup> | Full R <sup>2</sup> |
|----------|----------|---------------------|---------------------|
| 1.24E-06 | 2.41E-08 | 0.236935            | 0.98931             |

HEPC3 VH-N35S

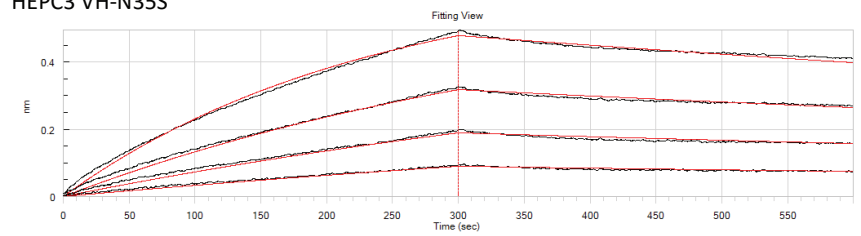

| KD (M)   | KD Error | Full X <sup>2</sup> | Full R <sup>2</sup> |
|----------|----------|---------------------|---------------------|
| 5.11E-07 | 7.47E-09 | 0.095416            | 0.997848            |

HEPC3 VH-E38A

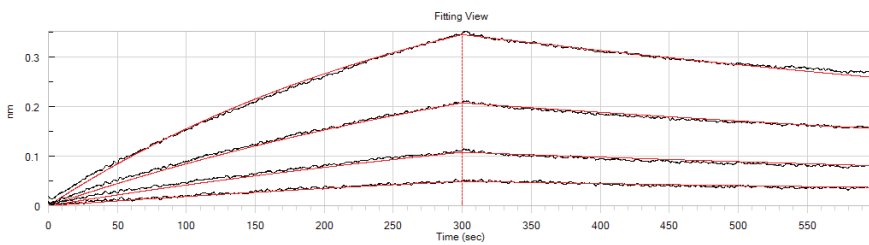

| KD (M)   | KD Error | Full X <sup>2</sup> | Full R <sup>2</sup> |
|----------|----------|---------------------|---------------------|
| 1.24E-06 | 1.87E-08 | 0.035795            | 0.998435            |

# Supplemental Figure 6B

HEPC3 VH-T40S

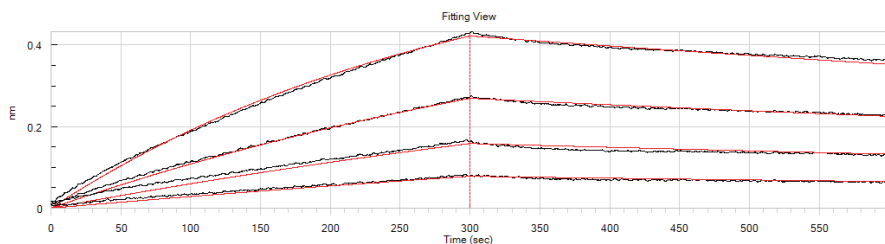

| KD (M)   | KD Error | Full X <sup>2</sup> | Full R <sup>2</sup> |
|----------|----------|---------------------|---------------------|
| 6.46E-07 | 1.23E-08 | 0.091593            | 0.997301            |

HEPC3 VH-T57I

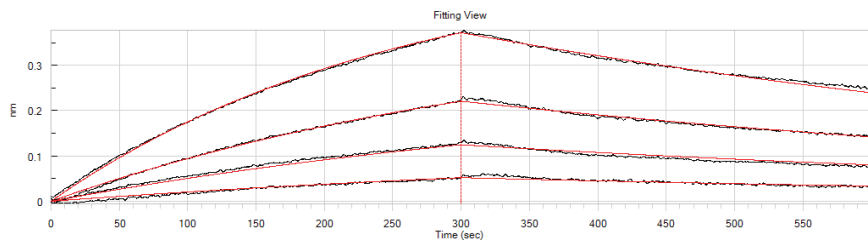

| KD (M)   | KD Error | Full X <sup>2</sup> | Full R <sup>2</sup> |
|----------|----------|---------------------|---------------------|
| 1.82E-06 | 2.46E-08 | 0.035704            | 0.998535            |

HEPC3 VH-63G

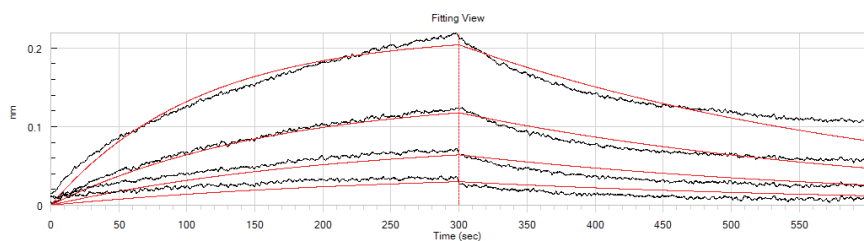

| KD (M)   | KD Error | Full X <sup>2</sup> | Full R <sup>2</sup> |
|----------|----------|---------------------|---------------------|
| 1.49E-06 | 3.93E-08 | 0.149456            | 0.977922            |

HEPC3 VH-E64T

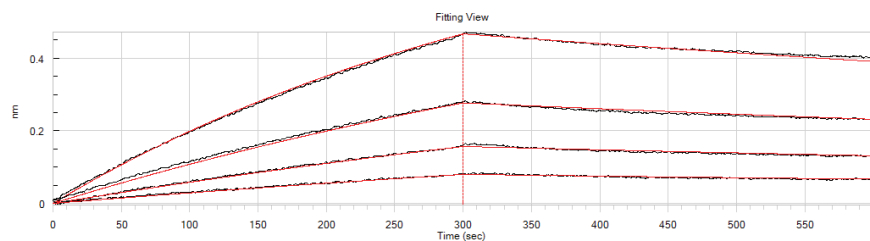

| KD (M)   | KD Error | Full X <sup>2</sup> | Full R <sup>2</sup> |
|----------|----------|---------------------|---------------------|
| 8.77E-07 | 1.22E-08 | 0.038604            | 0.999096            |

HEPC3 VH-T65A

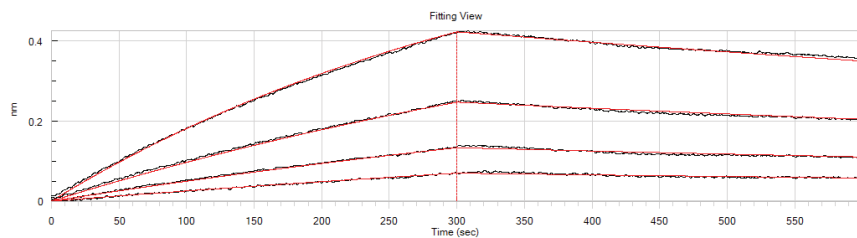

| KD (M)   | KD Error | Full X <sup>2</sup> | Full R <sup>2</sup> |
|----------|----------|---------------------|---------------------|
| 9.06E-07 | 1.10E-08 | 0.02515             | 0.999284            |

# Supplemental Figure 6C

## HEPC3 VH-T66N

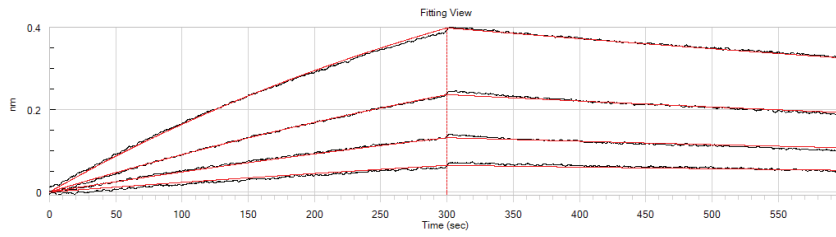

| KD (M)   | KD Error | Full X <sup>2</sup> | Full R <sup>2</sup> |
|----------|----------|---------------------|---------------------|
| 1.28E-06 | 2.23E-08 | 0.032017            | 0.998985            |

## HEPC3 VH-T87A

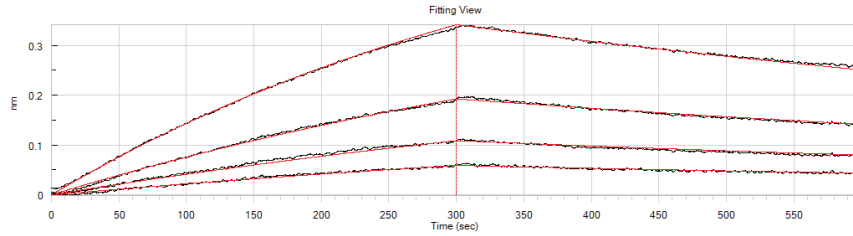

| KD (M)   | KD Error | Full X <sup>2</sup> | Full R <sup>2</sup> |
|----------|----------|---------------------|---------------------|
| 2.12E-06 | 3.24E-08 | 0.015773            | 0.999253            |

## HEPC3 VH-P96S

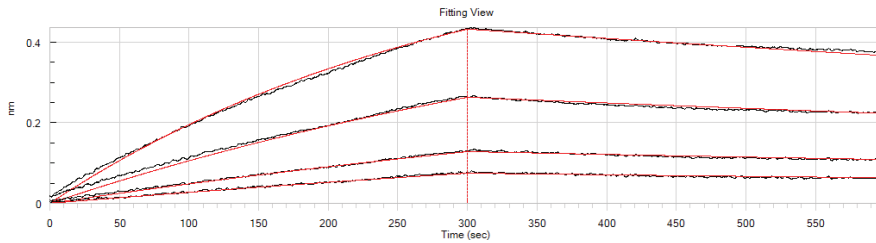

| KD (M)   | KD Error | Full X <sup>2</sup> | Full R <sup>2</sup> |
|----------|----------|---------------------|---------------------|
| 5.89E-07 | 8.82E-09 | 0.054157            | 0.998561            |

## HEPC3 VH-G111S

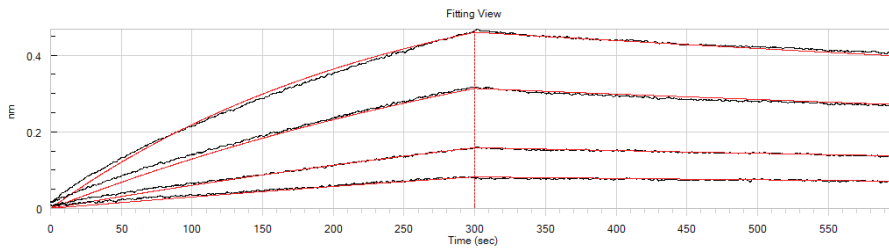

| KD (M)   | KD Error | Full X <sup>2</sup> | Full R <sup>2</sup> |
|----------|----------|---------------------|---------------------|
| 4.10E-07 | 6.74E-09 | 0.087339            | 0.998009            |

## HEPC3 VH-R112S

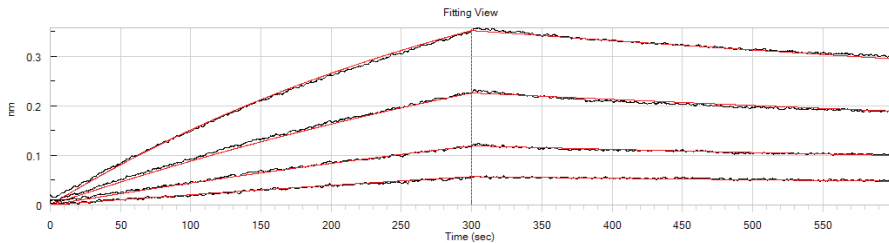

| KD (M)   | KD Error | Full X <sup>2</sup> | Full R <sup>2</sup> |
|----------|----------|---------------------|---------------------|
| 8.16E-07 | 1.09E-08 | 0.022449            | 0.999096            |



# Supplemental Figure 6D

HEPC3 VH-CDR1aII

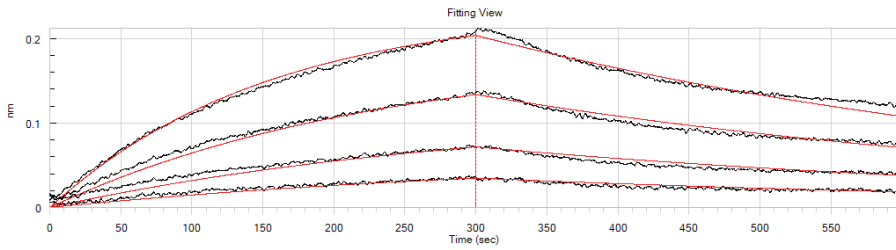

| KD (M)   | KD Error | Full X <sup>2</sup> | Full R <sup>2</sup> |
|----------|----------|---------------------|---------------------|
| 1.49E-06 | 2.68E-08 | 0.046836            | 0.993063            |

HEPC3 VH-CDR2aII

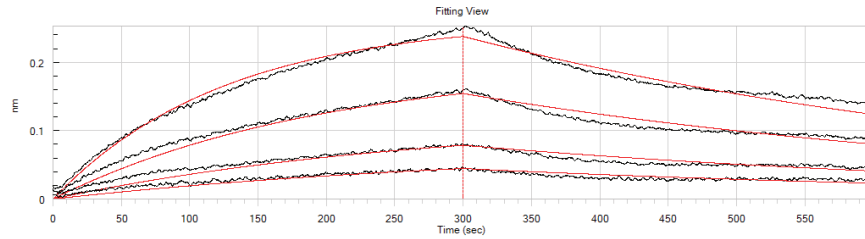

| KD (M)   | KD Error | Full X <sup>2</sup> | Full R <sup>2</sup> |
|----------|----------|---------------------|---------------------|
| 1.15E-06 | 2.09E-08 | 0.095841            | 0.989629            |

HEPC3 VH-CDR3aII

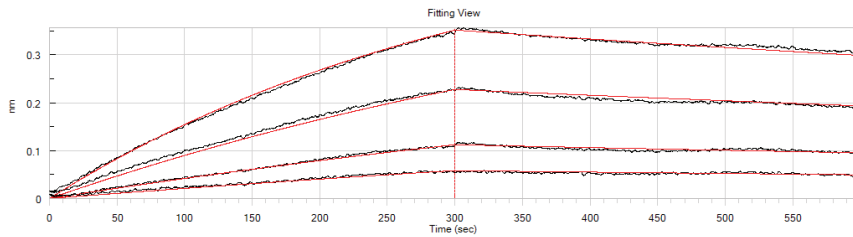

| KD (M)   | KD Error | Full X <sup>2</sup> | Full R <sup>2</sup> |
|----------|----------|---------------------|---------------------|
| 6.66E-07 | 1.21E-08 | 0.046164            | 0.998161            |

HEPC3 H-RUA

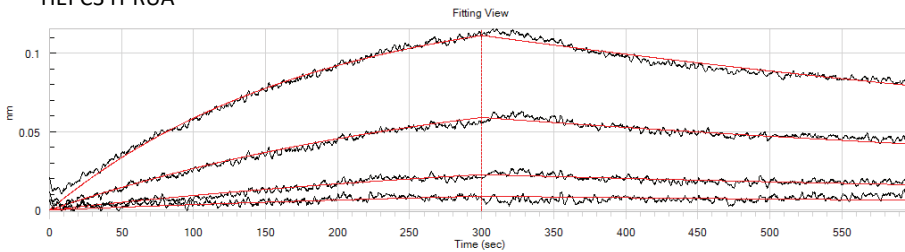

| KD (M)   | KD Error | Full X <sup>2</sup> | Full R <sup>2</sup> |
|----------|----------|---------------------|---------------------|
| 7.92E-07 | 1.36E-08 | 0.01114             | 0.995862            |

isotype control mAb

MR73

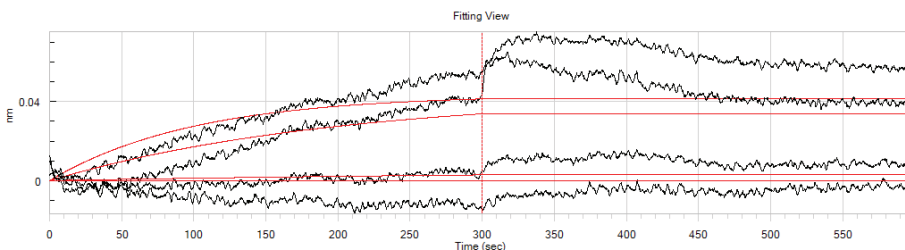

| KD (M)   | KD Error | Full X <sup>2</sup> | Full R <sup>2</sup> |
|----------|----------|---------------------|---------------------|
| 7.92E-07 | 1.36E-08 | 0.01114             | 0.995862            |

**Figure S6.** Octet association/dissociation curves with HEPC3 mAb variants and J6 (genotype 2a) soluble E2. KD values generated from these curves are summarized in Figure 6.

Supplemental Figure 7

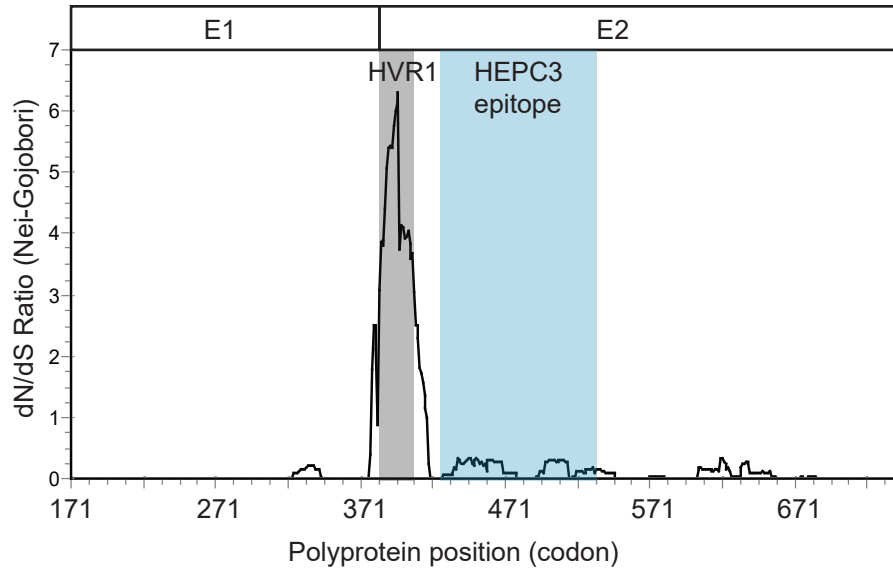

**Figure S7.** Ratio of nonsynonymous/synonymous mutations across all longitudinal E1E2 variants sequenced from subject 117. Analysis was performed with 20 codon windows and 1 codon steps. Hypervariable region 1 (HVR1) is shaded in gray, and the region spanning HEPC3 binding residues is shaded in blue.

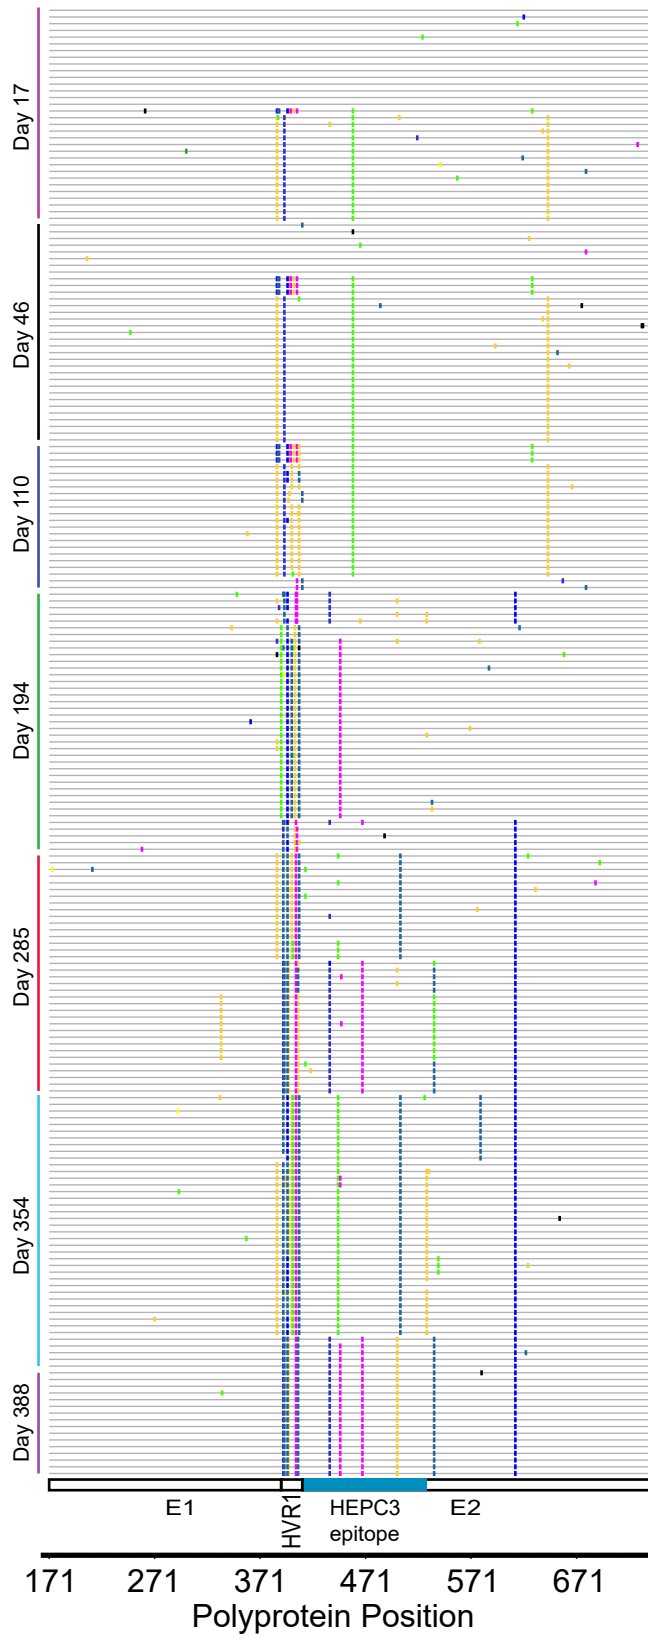

**Figure S8.** Highlighter plot indicating positions of amino acid differences in longitudinal E1E2 variants isolated from subject 117. Autologous variant transmitted/founder #3 (T/F#3) is used as the reference sequence, and sequences are arranged by their date of isolation. The locations of E1, E2, HVR1, and the region spanning HEPC3 binding residues are indicated.
